# Supplementary material
Source: PubMed Central journal article supplement (PMC3104809)
Supplement: nucl0201_0047SD1.pdf [file nucl0201_0047SD1.pdf]

## Supplementary Figure 1

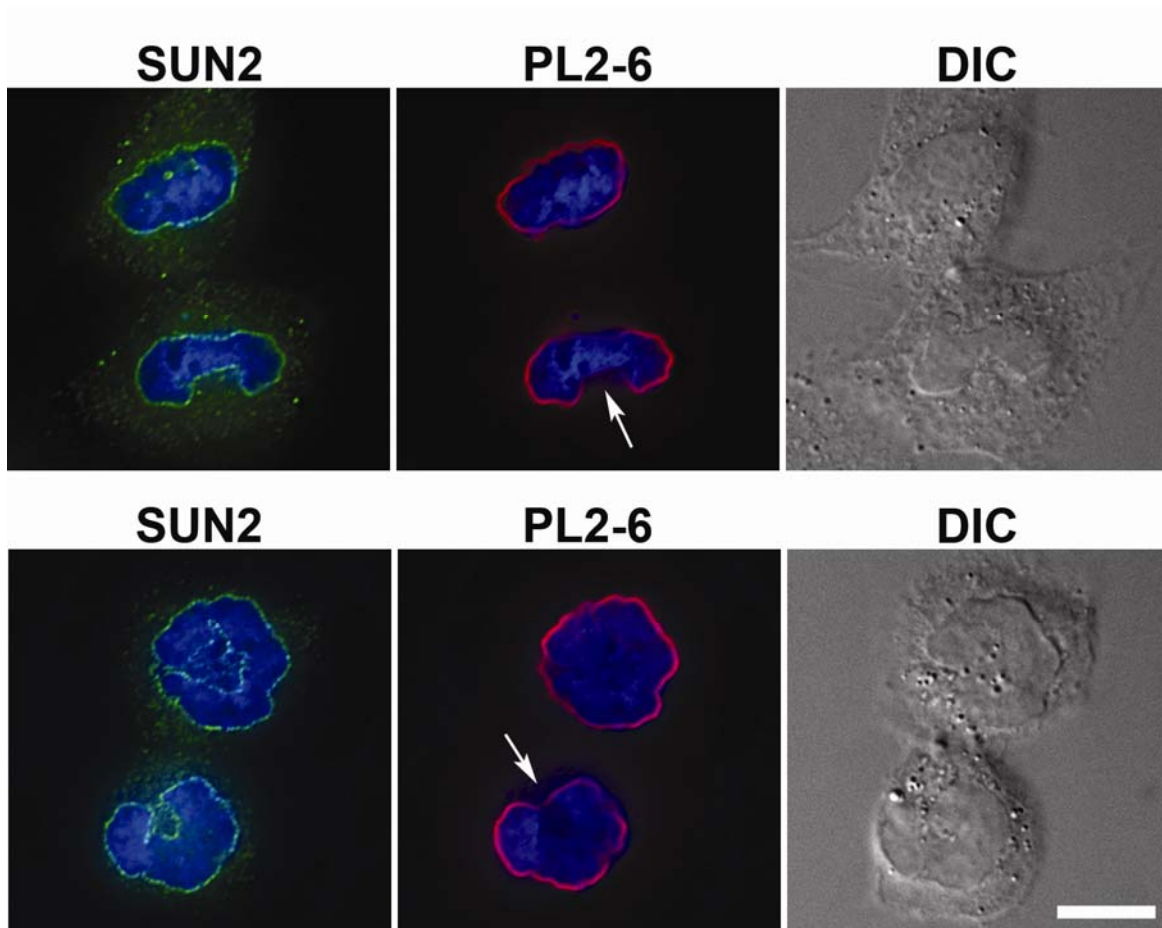

**Telophase U2OS cells demonstrating the absence of epichromatin staining of mitotic chromosome "cores".** Two examples of separating daughter cells are presented (appearing connected in the DIC images). Both examples are stained with anti-SUN2 and PL2-6. Arrows point to the mitotic chromosome cores. It is clear that anti-SUN2 has stained around the reforming daughter nuclei, including both the cores and periphery; but PL2-6 does not react with the core regions. Bar equals 10  $\mu\text{m}$ .

## Supplementary Figure 2

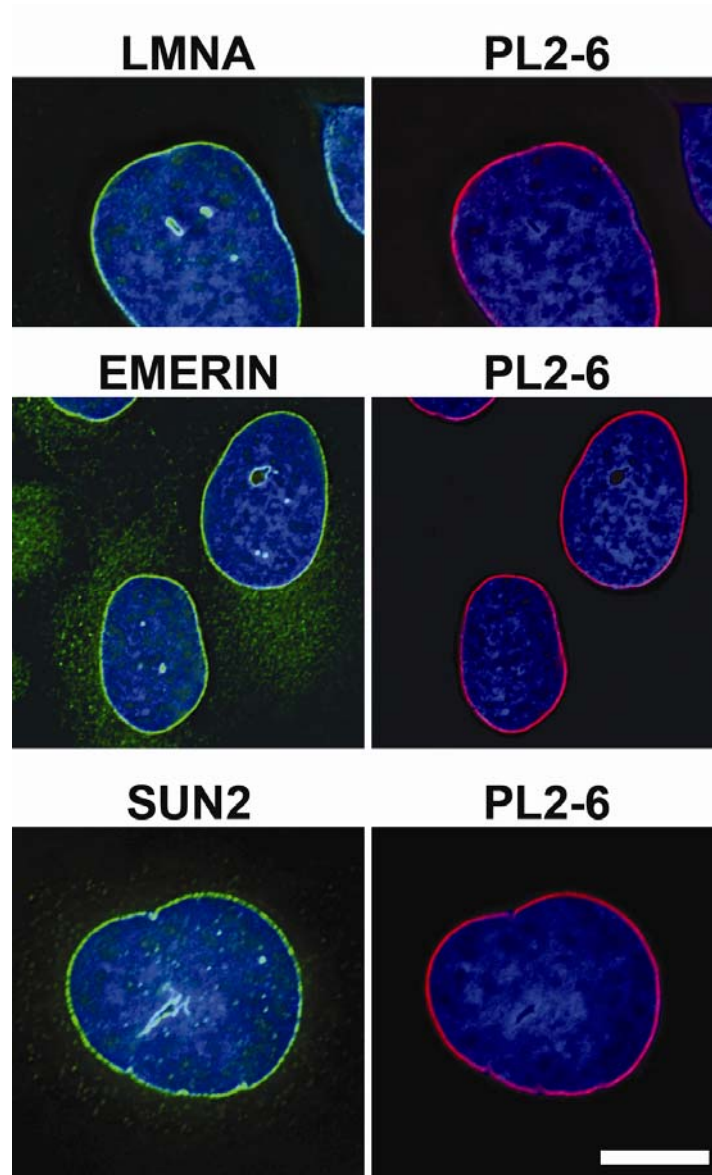

**Interphase U2OS cells demonstrating the absence of epichromatin staining of intranuclear tubules.** The left column of images pairs anti-lamin A (LMNA), emerlin or SUN2 with DAPI. The right column of images pairs PL2-6 with DAPI. Intranuclear tubules are clearly stained by anti-LMNA, emerlin and SUN2, but not by PL2-6. Bar equals 10  $\mu\text{m}$ .

## Supplementary Figure 3

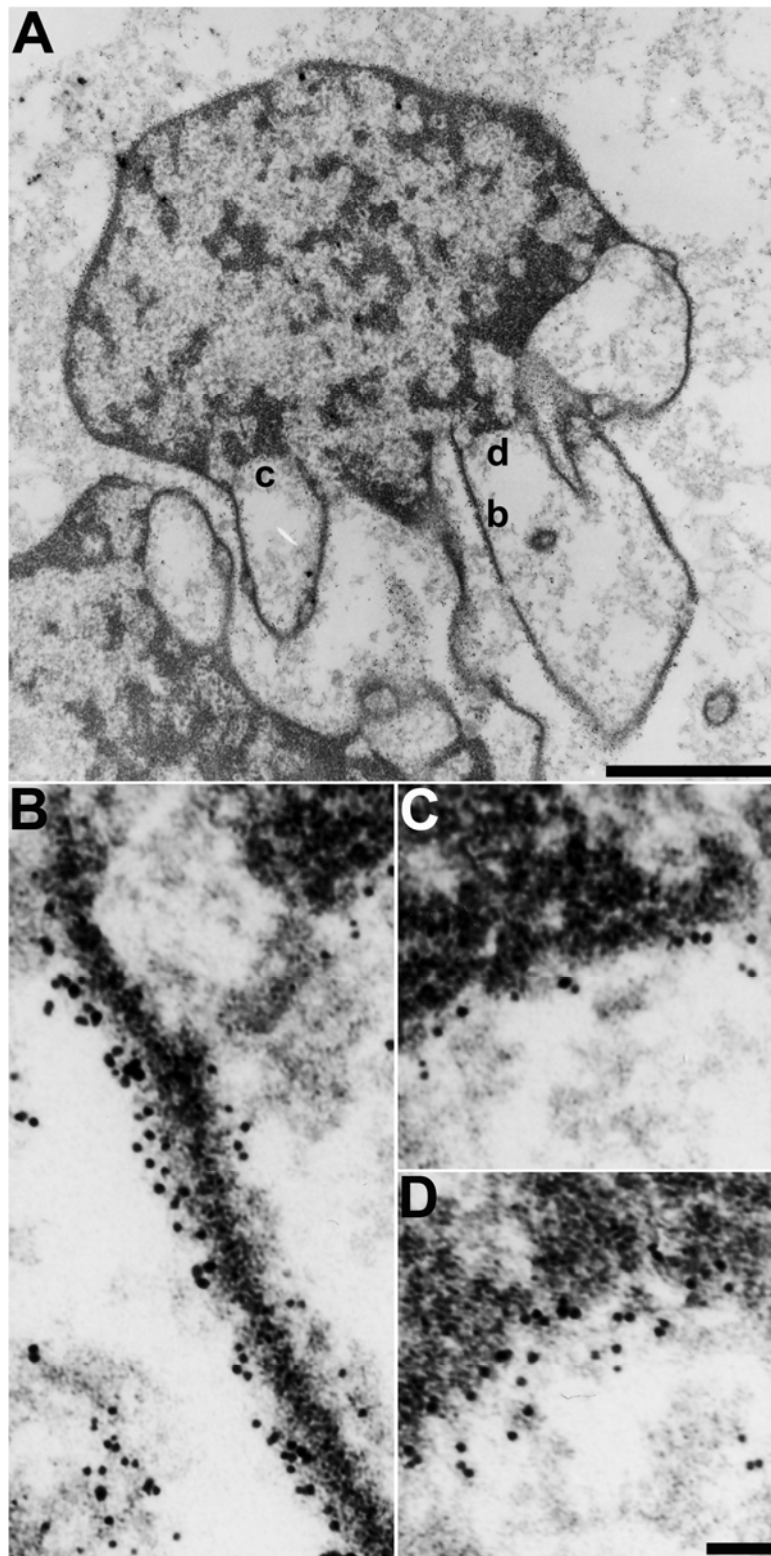

**Immunoelectron microscopic labeling of LBR at the NE periphery and within ELCS of RA treated HL-60/S4 cells.**

Panel A displays a granulocytic cell which exhibits nuclear lobulation and extensive formation of ELCS. Enlarged regions taken from panel A are as follows: panel B, taken from panel A (region "b"), presents a single ELCS; panel C and D, taken from panel A (regions "c and d"), displays segments of the nuclear surface. The NE and ELCS membranes can not be visualized because of the post-fixation detergent extraction and because the samples were not fixed with OsO<sub>4</sub>. Magnification bar values: panels A, 1  $\mu$ m; panels B, C and D, 100 nm.

## **Supplemental Video Legends**

**Video 1. Late Prophase.** Movie of projections through a stack of deconvolved slices of the epichromatin epitope distribution (red) in a late prophase U2OS cell (Fig. 2), rotating  $\pm 30^\circ$  around the vertical axis. This movie should be opened with a video player in the "loop" mode.

**Video 2. Early Anaphase.** Movie of projections through a stack of deconvolved slices of the epichromatin epitope distribution (red) in an early anaphase U2OS cell (Fig. 2), rotating  $\pm 30^\circ$  around the vertical axis. This movie should be opened with a video player in the "loop" mode.

**Video 3. Late Anaphase.** Movie of projections through a stack of deconvolved slices of the epichromatin epitope distribution (red) in a late anaphase U2OS cell (Fig. 2), rotating  $\pm 30^\circ$  around the vertical axis. This movie should be opened with a video player in the "loop" mode.

**Video 4. Early Telophase.** Movie of projections through a stack of deconvolved slices of the epichromatin epitope distribution (red) in an early telophase U2OS cell (Fig. 2), rotating  $\pm 30^\circ$  around the vertical axis. This movie should be opened with a video player in the "loop" mode.

**Video 5. Late Telophase.** Movie of projections through a stack of deconvolved slices of the epichromatin epitope distribution (red) in a late telophase U2OS cell (Fig. 2),

rotating  $\pm 30^\circ$  around the vertical axis. This movie should be opened with a video player in the "loop" mode.
